# Supplementary material for: The use of diffusion-ordered spectroscopy and complexation agents to analyze mixtures of catechins
Source: Royal Society of Chemistry journal article supplement (doi:10.1039/b900164f), 2009-01-01
Supplement: b900164f.pdf [file b900164f.pdf]

SUPPLEMENTARY INFORMATION

**Table 1.**  $^1\text{H}$  NMR chemical shifts of CH protons of catechins **1** – **4** ( $\delta$ , ppm) and complexation induced shifts (CIS) when in complex with  $\beta$ -CD in  $\text{D}_2\text{O}$  at 298 K.

|                   |          | H2     | H3     | H4 $\alpha$ | H4 $\beta$ | H6     | H8     | H2'    | H5'    | H6'    | H9',13' |
|-------------------|----------|--------|--------|-------------|------------|--------|--------|--------|--------|--------|---------|
| C ( <b>1</b> )    | $\delta$ | 4.151  | 4.7    | 2.467       | 2.792      | 6.021  | 5.941  | 6.861  | 6.842  | 6.784  |         |
|                   | CIS      | -0.068 | a      | 0.106       | a          | -0.016 | -0.094 | -0.139 | -0.172 | -0.152 |         |
| EC ( <b>2</b> )   | $\delta$ | 4.235  | 4.897  | 2.685       | 2.839      | 6.027  | 6.005  | 6.955  | 6.855  | 6.855  |         |
|                   | CIS      | -0.029 | -0.059 | -0.037      | 0.047      | -0.052 | -0.111 | -0.033 | 0.026  | -0.034 |         |
| EGC ( <b>3</b> )  | $\delta$ | 4.218  | 4.831  | 2.678       | 2.827      | 6.023  | 6.005  | 6.547  |        | 6.547  |         |
|                   | CIS      | -0.012 | -0.102 | 0.039       | 0.049      | -0.041 | -0.068 | 0.008  |        | 0.008  |         |
| EGCG ( <b>4</b> ) | $\delta$ | 5.030  | 5.516  | 2.841       | 2.972      | 6.074  | 6.042  | 6.496  |        | 6.496  | 6.899   |
|                   | CIS      | -0.211 | -0.214 | 0.019       | 0.246      | -0.138 | -0.136 | 0.223  |        | 0.223  | 0.109   |

a. Not visible in the NMR spectrum.

**Table 2.**  $^1\text{H}$  NMR chemical shifts of CH protons of  $\beta$ -CD alone ( $\delta$ , ppm) and complexation induced shifts (CIS) when in complex with catechins in  $\text{D}_2\text{O}$  at 298 K.

| $\beta$ -CD       |           | H-1    | H-2    | H-3    | H-4    | H-5    | H-6    |
|-------------------|-----------|--------|--------|--------|--------|--------|--------|
| C ( <b>1</b> )    | $\delta$  | 4.978  | 3.557  | 3.874  | 3.492  | 3.786  | 3.786  |
|                   | $\delta'$ | 4.941  | 3.529  | 3.806  | 3.481  | 3.593  | 3.677  |
| EC ( <b>2</b> )   | CIS       | -0.037 | -0.028 | -0.068 | -0.011 | -0.193 | -0.109 |
|                   | $\delta'$ | 4.948  | 3.529  | 3.808  | 3.493  | 3.692  | 3.717  |
| EGC ( <b>3</b> )  | CIS       | -0.03  | -0.028 | -0.066 | 0.001  | -0.094 | -0.069 |
|                   | $\delta'$ | 4.954  | 3.535  | 3.824  | 3.497  | 3.703  | 3.712  |
| EGCG ( <b>4</b> ) | CIS       | -0.024 | -0.022 | -0.05  | 0.005  | -0.083 | -0.074 |
|                   | $\delta'$ | 4.943  | 3.533  | 3.769  | 3.485  | 3.687  | 3.710  |
|                   | CIS       | -0.035 | -0.024 | -0.105 | -0.007 | -0.099 | -0.076 |

**Table 3.** ROE between C (**1**) (5 mM) and  $\beta$ -CD (5 mM) in D<sub>2</sub>O at 298 K.

| CD \ | H-3            | H-5 | H-4            |
|------|----------------|-----|----------------|
| H2   | W <sup>c</sup> |     |                |
| H3   |                | M   |                |
| H4   | M              |     |                |
| H6   | S              |     |                |
| H8   | S              |     |                |
| H2'  | W              |     | W              |
| H5'  | S <sup>a</sup> | M   | S              |
| H6'  | S              |     | M <sup>b</sup> |

ROE between EC (**2**) (5 mM) and  $\beta$ -CD (5 mM) in D<sub>2</sub>O at 298K.

| CD \ | H-2 | H-3 | H-5 | H-6 |
|------|-----|-----|-----|-----|
| H4   | M   | M   | M   | M   |
| H6   |     | W   | S   |     |
| H8   | W   | W   | S   |     |
| H2'  | W   | S   | M   | W   |
| H5'  | W   | M   | M   | W   |
| H6'  | W   | M   | M   | W   |

ROE between EGC (**3**) (5 mM) and  $\beta$ -CD (5 mM) in D<sub>2</sub>O at 298K.

| CD \   | H-2 | H-3 | H-5 | H-6 |
|--------|-----|-----|-----|-----|
| H2     |     | M   |     |     |
| H3     |     | S   |     |     |
| H4     |     | M   | W   |     |
| H6     |     | M   |     |     |
| H8     | W   | S   | M   | M   |
| H2',6' | W   | S   | M   | W   |

<sup>a, b, c</sup> S, strong; M, medium; and W, weak.

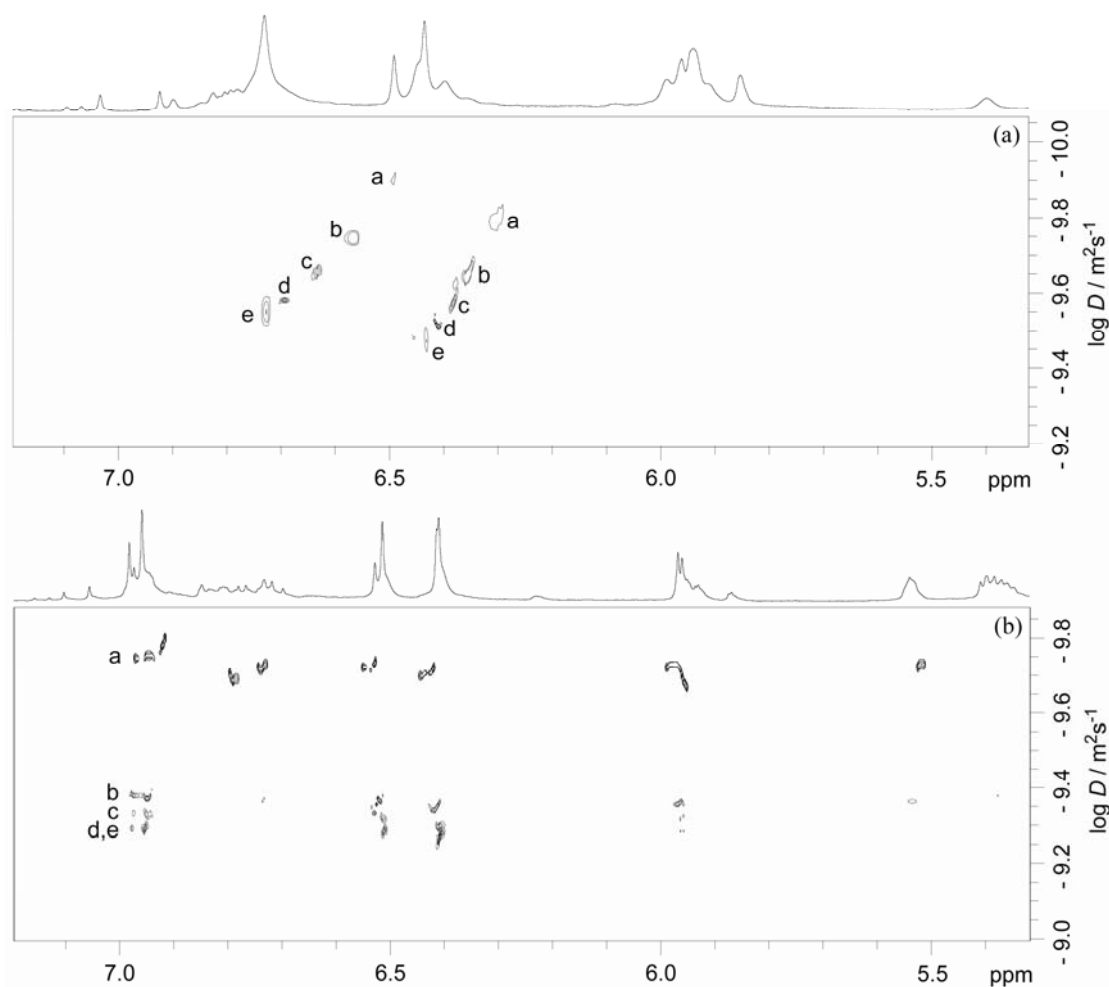

**Figure 1.** DOSY spectra of GTE showing the influence of viscosity on the diffusion coefficient. (A) Water extraction: a) concentrated sample, b) half concentration of sample a), c) 100 mg/mL, d) 50 mg/mL, e) 12 mg/mL (B) Methanol extraction: a) concentrated sample, b) 50 mg/mL, c) 25 mg/mL, d) 12 mg/mL, e) 6 mg/mL. The one-dimensional <sup>1</sup>H NMR spectra shown on the top of the DOSY spectra are those of sample e.
